# Supplementary material for: Integrity of xylan backbone affects plant responses to drought
Source: Front Plant Sci. 2024 Jun 25;15:1422701. doi: 10.3389/fpls.2024.1422701 (PMC11231379; doi:10.3389/fpls.2024.1422701)
Supplement: Supplementary file 2 [file Table_1.xlsx]

## Sheet: Tab S1- Primers
Supplementary Table S1. Primers used in this study.
Primers for expression analysis	Forward		Reverse		Length (nt)	Efficiency
Gene	Sequence 5´ to 3´	Tm(◦C)	Sequence 5´ to 3´	Tm(◦C)
Actin-At3g18780	GAAACCCTCGTAGATTGGCA	57.3	CTCTCCCGCTATGTATGTCGC	51	124	1.96
eF1a-At5g60390	TGGTGACGCTGGTATGGTTA	57.3	TCCTTCTTGTCCACGCTCTT	57.3	147	1.96
AnGH10	CAAGATCATGCACTGGGACG	55	CGTTGATGTACAGCTTCGCA	50	155	2
AnGH11	GGTACAATGCACCGTCCATC	59	TACTCTGGTACCCCTCCGTT	59.3	180	2
Primers used for cloning	Sequence 5´ to 3´	purpose
OC9Bf1	caccATGAGAAGGGGAGCTTCTTTCTGCCTCTTG	Forward primer to amplify signal peptide of PtxtCel9B3 with TOPO clonig adaptors
OC9Br5	ACGGGGGAGGACGGCgttgtaattgggtttGGCTTGGACAAAACC	Reverse primer to amplify signal peptide of PtxtCel9B3, followed by linker sequence and 5' part of GH10_AN1818.2
FC5f1	aaacccaattacaacGCCGTCCTCCCCCGTCAAAGCGCCAGCC	Forward primer to amplify linker fragment followed by 5' part of GH10_AN1818.2
FC5r1	AGACAGAGCGTTGACGATTGCGTTATAGGC	Reverse primer to amplify GH10_AN1818.2 without STOP codon
FC5r1s	ctaAGACAGAGCGTTGACGATTGCGTTATAG	Reverse primer to amplify GH10_AN1818.2 with STOP codon
FC4fuf	caccATGGTCTCCTTCAAATCTCTCCTAG	Forward primer to amplify full lenght of GH11_AN3613.2 with TOPO cloning adapter
FC4r1	ATAAACAGTAATAGAAGCCGACCCACTACTC	Reverse primer to amplify GH11_AN3613.2 without STOP codon
FC4r1s	ctaATAAACAGTAATAGAAGCCGACCCACTACTC	Reverse primer to amplify GH11_AN3613.2 with STOP codon

## Sheet: Tab S2- List of parameters
Supplementary Table S2. List of parameters used in this study and monitored during drought in PlantScreen™ modular facility. * - parameters used for Ward linkage clustering; N/A: not applicable for measured parameters.
Data Source	Acronym	Full Name	Calculation and hyperspectral ratio	Description
RGB Camera	Rosette Area	Rosette Area	N/A	Total area in mm2 covered with plant mask
RGB Camera	Gr*	Growth Rate	Calculated from computed trendline equations (Table S3)	Modelized speed of rosette growth
RGB Camera	Slenderness*	Plant leaves slenderness	length/width of each leaf	Measure of plant shape or elongation
RGB Camera	Hue 1	Hue at RGB coordinate: 110,111,90	N/A	Number of pixels with color code of Red (110), Green (111), Blue (90)
RGB Camera	Hue 2	Hue at RGB coordinate: 90,98,58	N/A	Number of pixels with color code of Red (90), Green (98), Blue (58)
RGB Camera	Hue 3*	Hue at RGB coordinate: 72,84,58	N/A	Number of pixels with color code of Red (72), Green (84), Blue (58)
RGB Camera	Hue 4*	Hue at RGB coordinate: 73,86,36	N/A	Number of pixels with color code of Red (73), Green (86), Blue (36)
RGB Camera	Hue 5*	Hue at RGB coordinate: 57,71,46	N/A	Number of pixels with color code of Red (57), Green (71), Blue (46)
RGB Camera	Hue 6*	Hue at RGB coordinate: 59,71,20	N/A	Number of pixels with color code of Red (59), Green (71), Blue (20)
RGB Camera	Hue 7	Hue at RGB coordinate: 45,55,36	N/A	Number of pixels with color code of Red (45), Green (55), Blue (36)
RGB Camera	Hue 8	Hue at RGB coordinate: 45,55,13	N/A	Number of pixels with color code of Red (45), Green (55), Blue (13)
RGB Camera	Hue 9	Hue at RGB coordinate: 34,38,22	N/A	Number of pixels with color code of Red (34), Green (38), Blue (22)
Fluorescence	Fo*	Initial fluorescence	N/A	Minimum chlorophyll fluorescence in dark-adapted state
Fluorescence	Fm	Maximum fluorescence	N/A	Maximum chlorophyll fluorescence in dark-adapted state
Fluorescence	Fv*	Variable fluorescence	Fo-Fm	Difference of fluorescence between Fo and Fm in dark-adapted state
Fluorescence	Fv/Fm*	Maximum quantum yield of photosystem II	Fv/Fm	Maximum quantum yield of PSII (QY_max)
Hyperspectral (VNIR)	SIPI*	Structure Independent Pigment Index	(R(790)-R(450))/(R(790)+R(650))	Carotenoids/chlorophyll a ratio from leaf spectral reflectance
Hyperspectral (VNIR)	OSAVI*	Optimized Soil-Adjusted Vegetation Index	(1+0.16)*(R(800)-R(670))/(R(800)-R(670)+0.16)	Corrected vegetation index for soil background
Hyperspectral (VNIR)	MCARI1*	Modified Chlorophyll Absorption in Reflectance Index	1.2*(2.5*(R(800)-R(670))-1.3*(R(800)-R(550)))	Index for chlorophyll content
Hyperspectral (VNIR)	PRI*	Photochemical Reflectance Index	(R(531)-R(570))/(R(531)+R(570))	Index of xantophyll cycle activity / Photosynthetic light-use-efficiency / Indicator of stress
Hyperspectral (VNIR)	PSRI*	Plant Senescence Reflectance Index	(R(680)-R(500))/R(750)	Maximize sensitivity of the index to the ratio of bulk carotenoid to chlorophyll
Hyperspectral (VNIR)	NDVI*	Normalized Difference Vegetation Index	(R(800)-R(670))/(R(800)+R(670))	Widely used index correlated with aboveground green biomass
Hyperspectral (VNIR)	NDVI2*	Normalized Difference Vegetation Index 2	(R(400)-R(670))/(R(400)+R(670))	Enhanced version of NDVI
Hyperspectral (SWIR)	WLI/NDVI*	Water Loss Index	(R1440/R960)/NDVI	Plant water loss index that increases in drought stress

## Sheet: Tab S3- Equations
Supplementary Table S3. Trendline equations and their fits (R2) from the kinetics of rosette area growth. WW – Well-Watered; MD – Moderate Drought; SD – Severe Drought conditions.
Line	Conditions	Trendline equation	R2
Col0	WW	y = 4.5085x2 + 26.744x + 76.763	0.9996
	MD	y = 4.4698x2 + 12.035x + 79.624	0.9998
	SD	y = 2.202x2 + 18.145x + 79.388	0.9995
irx9	WW	y = 1.9134x2 + 18.501x + 70.156	0.9988
	MD	y = 1.6629x2 + 18.888x + 65.625	0.9993
	SD	y = 0.827x2 - 1.4047x + 82.321	0.9938
irx10	WW	y = 3.8616x2 + 17.089x + 85.86	0.9998
	MD	y = 3.3477x2 + 32.564x + 83.98	0.9998
	SD	y = 1.7554x2 + 7.5088x + 95.554	0.999
irx14	WW	y = 2.2311x2 + 16.273x + 48.739	0.9998
	MD	y = 2.4579x2 + 13.06x + 64.316	0.9994
	SD	y = 2.1705x2 + 2.5535x + 80.475	0.998
GH10.1	WW	y = 3.1632x2 + 36.555x + 59.573	0.9991
	MD	y = 4.1812x2 + 15.13x + 84.637	0.9999
	SD	y = 2.0337x2 + 5.5524x + 99.279	0.9988
GH10.2	WW	y = 3.7559x2 + 34.76x + 72.693	0.9988
	MD	y = 3.7873x2 + 29.724x + 77.753	0.9997
	SD	y = 1.8204x2 + 9.6415x + 99.938	0.9988
GH11.1	WW	y = 3.5134x2 + 19.205x + 69.487	0.9996
	MD	y = 2.7083x2 + 17.376x + 55.034	0.9996
	SD	y = 1.2826x2 + 5.0227x + 92.347	0.997
GH11.2	WW	y = 4.1853x2 + 37.863x + 73.071	0.9995
	MD	y = 3.9291x2 + 30.978x + 74.867	0.9997
	SD	y = 2.0145x2 + 19.017x + 85.87	0.9992

## Sheet: Tab S4- E and L parameters
Supplementary Table S4. Values of different parameters measured in PlantScreen™ modular facility during early (E) and late (L) responses to moderate (MD) and severe (SD) drought, expressed as ratios to the values in well-watered conditions. For MD, E and L were recorded at day 22 and 32; for SD, E and L were recorded at day 27 and 37, respectively. SE: Standard Error. All abbreviations are explai…
Parameters	treatment (MD/SD) & timing (E/L)	Col-0		irx9		irx10		irx14		GH10.1		GH10.2		GH11.1		GH11.2
		mean	se	mean	se	mean	se	mean	se	mean	se	mean	se	mean	se	mean	se
Fm	MD E	0.989295	0.0215942	1.044	0.0262122	1.06459	0.0167984	1.01958	0.0200615	1.00635	0.0145165	1.01414	0.0205191	0.994504	0.0191529	1.00355	0.0150809
	MD L	1.00814	0.0128456	1.03091	0.01526	1.04026	0.0104722	1.04349	0.0114891	1.01362	0.00540762	1.02585	0.00811706	0.999245	0.0113918	1.03079	0.00733187
	SD E	1.0448	0.00589179	1.03074	0.0144488	1.04784	0.0102286	1.0755	0.0102593	1.02547	0.0136551	1.04736	0.00899859	1.02283	0.0121694	1.01748	0.00946724
	SD L	0.974834	0.00920657	0.973254	0.0095411	0.990199	0.0103886	1.00847	0.0100428	1.00051	0.00940146	0.97801	0.0136038	0.959854	0.0190495	0.983558	0.0127613
Fo	MD E	0.98034	0.0154248	1.01343	0.0230424	1.02282	0.0180356	0.972031	0.0226665	1.01031	0.0118457	1.00875	0.0153443	0.981452	0.0207116	0.984045	0.0145932
	MD L	1.0119	0.00967003	1.02772	0.0169695	1.0107	0.012487	0.998956	0.0127597	1.0017	0.00819435	1.00274	0.0113503	0.994985	0.0119821	1.00975	0.00926383
	SD E	1.01164	0.00677716	0.993617	0.0164759	0.964613	0.0144453	1.02158	0.0134406	0.996236	0.0112446	1.01598	0.0111738	0.99499	0.0143623	1.01144	0.0124149
	SD L	0.949174	0.0105389	0.957946	0.0106303	0.926647	0.0109899	0.955929	0.00857773	0.967257	0.0111305	0.946638	0.0135268	0.921921	0.0177852	0.947691	0.0114004
Fv	MD E	0.990919	0.0230137	1.04949	0.0269375	1.07278	0.018272	1.02837	0.0198718	1.00563	0.0154734	1.01514	0.0218792	0.996934	0.0190665	1.00718	0.015701
	MD L	1.00753	0.0138121	1.03143	0.0162282	1.04546	0.0122393	1.05099	0.0116187	1.01562	0.00610505	1.02979	0.00848727	0.999971	0.0125619	1.03439	0.00775112
	SD E	1.05029	0.00604261	1.03687	0.0149451	1.06315	0.0102779	1.08462	0.0104985	1.03041	0.0146076	1.05276	0.00994974	1.02763	0.0130083	1.01853	0.0103666
	SD L	0.978855	0.00923205	0.975693	0.00958869	1.00091	0.0104508	1.01698	0.010476	1.00587	0.00938099	0.983124	0.0140643	0.966077	0.019441	0.989458	0.013186
Fv/Fm	MD E	1.00234	0.0021849	1.00696	0.00149939	1.00925	0.00317777	1.01164	0.00177204	0.998693	0.002244	0.999745	0.00358856	1.00358	0.0015041	1.00481	0.00198599
	MD L	0.999198	0.00199712	1.0011	0.00309368	1.00544	0.00333558	1.00945	0.00141801	1.00379	0.00173022	1.00556	0.00192195	1.00087	0.00293531	1.0052	0.00156982
	SD E	1.00651	0.000733264	1.00706	0.00280512	1.01672	0.00196949	1.00986	0.00184088	1.00494	0.00230778	1.0055	0.00263953	1.00412	0.00290612	1.00007	0.00286297
	SD L	1.00549	0.000807996	1.00558	0.000759511	1.01273	0.000705853	1.01117	0.000870798	1.00701	0.000857014	1.00669	0.00204787	1.00899	0.00122695	1.00809	0.00095017
Gr	MD E	0.812282	0.0771597	0.933784	0.0931875	1.15155	0.103785	1.07583	0.0782481	0.88582	0.0616972	1.08207	0.0741428	0.817124	0.0814631	0.942659	0.0734147
	MD L	0.84642	0.0602692	0.926605	0.109686	1.08979	0.0842465	0.976059	0.0852323	0.943293	0.0634984	0.947142	0.0796996	0.803973	0.0678066	0.871353	0.0609711
	SD E	0.562548	0.0594861	0.19681	0.0377325	0.469081	0.0618048	0.608829	0.07501	0.377978	0.0393412	0.387299	0.0342668	0.340662	0.0451685	0.490122	0.0545371
	SD L	0.540035	0.0825795	0.354187	0.0708429	0.464551	0.0710268	0.824476	0.105787	0.566107	0.0766505	0.484534	0.106174	0.327222	0.0917356	0.494571	0.0798974
Hue3	MD E	1.26749	0.0613181	1.54579	0.111552	1.11036	0.0652184	1.19377	0.0603594	1.06918	0.0681865	1.12493	0.072265	1.23875	0.0711908	1.4322	0.0590614
	MD L	1.66299	0.165651	1.38396	0.0634954	1.55607	0.12024	1.99016	0.128042	1.3282	0.112668	1.51236	0.127439	1.51492	0.127766	1.76508	0.174454
	SD E	2.331	0.125991	1.50896	0.051103	2.73836	0.172931	2.87677	0.230275	2.8999	0.185306	2.63774	0.226667	3.30273	0.270587	2.30175	0.186785
	SD L	1.85621	0.0866004	1.04754	0.0920386	2.99	0.120877	2.21977	0.0766077	2.66176	0.100021	2.26976	0.0806465	2.3719	0.0945371	2.3418	0.108856
Hue4	MD E	0.936923	0.040907	0.814086	0.0591709	1.0579	0.0366965	1.07015	0.0503695	0.860556	0.0372538	0.980887	0.0532675	0.961497	0.0382307	1.01744	0.0498786
	MD L	0.830157	0.0246332	0.595237	0.079842	0.9218	0.0436267	0.853457	0.0421559	0.91353	0.0292248	0.988999	0.0380605	0.876724	0.0397046	0.992107	0.0345159
	SD E	0.84156	0.0302886	0.295078	0.0401575	0.767908	0.0426446	0.796633	0.0485595	0.709292	0.0446551	0.704912	0.0532108	0.616579	0.0513396	0.913616	0.0345077
	SD L	0.605758	0.0450013	0.129252	0.0414297	0.263943	0.0293141	0.422515	0.0357236	0.316565	0.0286311	0.367179	0.0434452	0.220475	0.038778	0.596172	0.0393915
Hue5	MD E	1.04414	0.0475856	1.15962	0.065808	0.980257	0.0502938	0.979922	0.0337367	1.02185	0.0203442	0.972686	0.0351661	1.0473	0.0423444	1.23566	0.0374824
	MD L	1.60969	0.128889	1.41734	0.0774655	1.34443	0.11399	1.64642	0.120293	1.35402	0.104501	1.4375	0.134375	1.50441	0.104487	1.3879	0.131006
	SD E	1.93312	0.0912896	2.28811	0.11028	2.35935	0.115771	1.98428	0.127586	2.36257	0.105571	2.48956	0.195893	2.518	0.197886	1.72582	0.10349
	SD L	2.05231	0.140457	2.08087	0.0990559	3.11067	0.122704	2.41621	0.131285	2.55658	0.133944	2.5075	0.158822	3.08751	0.196813	2.32926	0.242295
Hue6	MD E	0.729621	0.0737672	0.613133	0.0792636	0.834737	0.0936551	0.768027	0.0718571	0.588202	0.0533398	0.873089	0.0760489	0.711848	0.0735484	0.746862	0.0597211
	MD L	0.923812	0.0608831	0.665719	0.081729	1.15169	0.080689	1.10182	0.0921048	1.0858	0.0701323	1.00631	0.0572297	0.808599	0.063288	1.09005	0.0628114
	SD E	0.68898	0.0730871	0.264462	0.0502486	0.880963	0.100949	0.742408	0.0919625	0.786748	0.0947843	0.971611	0.100662	0.675305	0.0986021	0.836521	0.0790611
	SD L	0.602308	0.0578348	0.143673	0.0320611	0.45377	0.0601233	0.704556	0.0700038	0.412958	0.0439883	0.511164	0.0457776	0.310296	0.0394695	0.626056	0.0563047
MCARI1	MD E	1.02575	0.0173671	1.03957	0.0198746	1.06673	0.0141358	1.07118	0.0143493	1.02795	0.0123744	1.03987	0.0131024	1.0171	0.0201868	1.02269	0.0142768
	MD L	0.996204	0.0121401	1.02383	0.0173499	1.03857	0.0118468	1.02878	0.0121896	1.00904	0.00758402	1.02387	0.00889914	1.00674	0.0131389	1.01762	0.00991374
	SD E	1.05553	0.00757995	1.03936	0.0130516	1.0538	0.0103509	1.07298	0.0111165	1.03025	0.0126232	1.03844	0.00928455	1.03266	0.0110929	1.02722	0.00937692
	SD L	1.00256	0.00786583	0.988898	0.0113474	0.996938	0.00783396	1.02478	0.00860475	1.00943	0.0098004	0.981862	0.0108922	0.984148	0.0153025	0.999021	0.0107005
NDVI	MD E	0.996787	0.00734031	1.01006	0.00722778	1.01649	0.00469012	1.00778	0.00781997	0.983672	0.00582032	0.987959	0.00939007	0.985746	0.00797451	0.992524	0.00650518
	MD L	0.985142	0.00462313	0.990879	0.00626109	1.00712	0.00480573	1.00055	0.005555	0.991653	0.00335525	0.996089	0.00355092	0.985814	0.00416143	0.998253	0.00341474
	SD E	0.97682	0.00475093	0.981377	0.00609828	0.990011	0.0056613	0.989989	0.00539312	0.968982	0.00745475	0.983544	0.00383017	0.976622	0.00633132	0.974521	0.00559559
	SD L	0.959901	0.00395286	0.958805	0.0037032	0.95022	0.00440088	0.969865	0.00496601	0.950719	0.00396287	0.954081	0.00298432	0.946159	0.00529206	0.959296	0.00422529
NDVI2	MD E	3.72991	0.711542	2.74887	0.47054	1.90788	0.310429	6.29971	0.859747	2.09044	0.265364	1.71661	0.227878	2.22289	0.346993	1.74919	0.232514
	MD L	1.06303	0.0472216	1.09657	0.0526653	1.15506	0.0535091	1.1075	0.0668593	1.15167	0.0459122	1.09525	0.0391614	1.05647	0.0525427	1.08775	0.0378673
	SD E	1.27466	0.0662479	1.29095	0.103596	1.38002	0.0965361	1.49491	0.107493	1.20968	0.0883524	1.3817	0.0649574	1.32011	0.0915007	1.21139	0.0695841
	SD L	0.849647	0.0395117	0.857081	0.0493454	0.820409	0.0473621	0.920458	0.0491299	0.807435	0.0438449	0.932942	0.0311741	0.814616	0.0436366	0.83688	0.0353832
OSAVI	MD E	1.02981	0.00611008	1.03926	0.00800749	1.0371	0.00517038	1.04025	0.00547408	1.02782	0.00477082	1.02542	0.00548164	1.02414	0.0087426	1.02205	0.00506859
	MD L	1.0112	0.00452493	1.0229	0.00596316	1.02579	0.00369988	1.02614	0.00394417	1.01342	0.00304269	1.01693	0.00280919	1.01274	0.0048259	1.0165	0.00337028
	SD E	1.04763	0.00214535	1.05471	0.00514525	1.05298	0.00389361	1.06143	0.00410952	1.0432	0.00444829	1.04334	0.00401033	1.04696	0.00474098	1.0348	0.00308926
	SD L	1.02027	0.00194144	1.02378	0.0039083	1.02524	0.00242065	1.02881	0.00249644	1.02433	0.00291821	1.0152	0.00242751	1.02438	0.00351276	1.01749	0.00241345
PRI	MD E	0.638704	0.23878	0.575616	3.03943	0.530712	0.174895	0.396854	0.190537	1.1559	0.253693	1.5934	0.863171	1.11406	0.372714	0.761241	0.65462
	MD L	1.0781	0.0702085	1.05813	0.122933	1.2015	0.0931873	1.23794	0.186484	1.07664	0.0735838	1.06173	0.0956132	0.940899	0.138994	1.13536	0.127502
	SD E	0.830306	0.0859697	0.821766	0.104305	1.02394	0.158319	1.09122	0.124355	0.837462	0.1063	0.89886	0.0936765	0.865461	0.120371	0.85541	0.0818753
	SD L	0.761216	0.0469911	0.75487	0.0665854	0.786876	0.074498	0.928582	0.0633763	0.783243	0.0595607	0.760394	0.0612131	0.712665	0.0588069	0.783701	0.0483929
PSRI	MD E	1.22688	0.0382522	1.29042	0.0664756	1.03468	0.0315076	1.05568	0.0414505	1.38115	0.0645676	1.28482	0.0381991	1.27193	0.0577177	1.22454	0.0431901
	MD L	1.31502	0.042514	1.26336	0.0612253	1.22979	0.0428604	1.32226	0.0561729	1.34835	0.0442653	1.27832	0.052325	1.30633	0.0515396	1.28761	0.0362192
	SD E	1.67229	0.0406967	1.68944	0.0669498	1.63266	0.0447447	1.6904	0.0356598	2.0066	0.0797018	1.80364	0.0517251	1.66697	0.0674523	1.75357	0.0520603
	SD L	1.65452	0.0334595	1.97757	0.0631921	1.8111	0.0458893	1.73079	0.0442297	2.02038	0.0667959	1.96847	0.0486606	1.9468	0.0733238	1.71878	0.0468497
SIPI	MD E	0.999723	0.00640092	1.01586	0.00490495	1.01377	0.00411081	1.00706	0.00658578	0.993021	0.00484759	0.998444	0.00734071	0.994336	0.00643148	0.997659	0.00577324
	MD L	0.99191	0.00451381	0.998069	0.00530474	1.01185	0.00456789	1.01054	0.00470809	0.996426	0.00320843	1.00151	0.00281658	0.992476	0.0040345	1.00397	0.00330861
	SD E	0.994434	0.00395394	1.00334	0.00404426	1.00518	0.00474911	1.00921	0.00455018	0.990691	0.00561362	0.999447	0.00323228	0.993823	0.00484098	0.990161	0.00470836
	SD L	0.97348	0.00384016	0.985311	0.00379315	0.968255	0.00395826	0.987703	0.00468013	0.96852	0.00325222	0.967616	0.00283509	0.964903	0.00512816	0.972743	0.00400373
Slenderness	MD E	1.04264	0.0739235	1.02595	0.0848573	0.973772	0.0789907	0.819287	0.0658186	1.06912	0.0651236	0.918972	0.0949298	0.880791	0.11067	0.821036	0.0940989
	MD L	0.755414	0.0780605	0.98954	0.158716	0.989006	0.141447	0.734159	0.0768693	0.788672	0.119598	0.630143	0.10033	0.677301	0.0957055	0.594339	0.064027
	SD E	0.686275	0.0430126	1.11987	0.121385	0.59618	0.0453154	0.747202	0.0561608	0.584471	0.0524206	0.628852	0.05265	0.745343	0.0910844	0.553228	0.0543254
	SD L	0.62971	0.0382306	0.927379	0.102713	0.790801	0.0803718	0.677701	0.0491204	0.680111	0.0804774	0.47536	0.0567679	0.778006	0.0908011	0.3283	0.0250778
WLI/NDVI	MD E	1.07669	0.0191925	1.05199	0.0254704	1.02642	0.020582	1.04561	0.0328402	1.17251	0.0252198	1.09535	0.0181893	1.16513	0.0517867	1.12863	0.0313774
	MD L	1.15883	0.0222965	1.07958	0.0290458	1.0448	0.0209623	1.07926	0.0248589	1.11902	0.0164859	1.11617	0.0241307	1.1207	0.0221551	1.10338	0.016585
	SD E	1.23747	0.0205303	1.20697	0.0196872	1.18918	0.0233265	1.17349	0.0207343	1.26825	0.0292861	1.28341	0.0185401	1.21383	0.028867	1.2843	0.0262003
	SD L	1.33042	0.0272793	1.27675	0.0206359	1.33	0.0286953	1.21784	0.0285007	1.34127	0.0255301	1.36349	0.0268151	1.32873	0.031615	1.34246	0.0282364
